# Supplementary material for: Suboptimal culture conditions induce more deviations in gene expression in male than female bovine blastocysts
Source: PubMed Central journal article supplement (PMC4724126; doi:10.1186/s12864-016-2393-z), 2016-01-22
Supplement: 12864_2016_2393_MOESM2_ESM.pdf [file 12864_2016_2393_MOESM2_ESM.pdf]

| <b>Number of genes expressed per embryo in each condition with RPKM &gt; 0.4</b> |                    |                    |                    |                    |                    |                  |
|----------------------------------------------------------------------------------|--------------------|--------------------|--------------------|--------------------|--------------------|------------------|
| <b>Condition</b>                                                                 | <b>Replicate 1</b> | <b>Replicate 2</b> | <b>Replicate 3</b> | <b>Replicate 4</b> | <b>Replicate 5</b> | <b>Mean ± SD</b> |
| Male <i>in vivo</i>                                                              | 11,022             | 10,750             | 10,414             | 10,370             | 10,654             | 10,642 ± 265.6   |
| Female <i>in vivo</i>                                                            | 10,919             | 10,785             | 10,467             | -                  | -                  | 10,724 ± 232.2   |
| Male serum                                                                       | 10,276             | 9,560              | 10,168             | -                  | -                  | 10,001 ± 386     |
| Female serum                                                                     | 10,300             | 11,009             | 11,205             | 11,073             | 11,113             | 10,940 ± 364.8   |
| Male serum-free                                                                  | 10,733             | 11,115             | 10,451             | 11,290             | 10,776             | 10,873 ± 331.5   |
| Female serum-free                                                                | 10,651             | 11,122             | 10,985             | -                  | -                  | 10,919 ± 242.3   |
